# Supplementary material
Source: PubMed Central journal article supplement (PMC2638025)
Supplement: supp_180_4_385_v2_2.pdf [file supp_180_4_385_v2_2.pdf]

## Appendix 2 (as supplied by the authors): Supplemental Search for long-acting insulin analogues

### OVERVIEW

|                 |                                                                                                                                                                                                          |
|-----------------|----------------------------------------------------------------------------------------------------------------------------------------------------------------------------------------------------------|
| Interface:      | OVID                                                                                                                                                                                                     |
| Databases:      | BIOSIS Previews <1989 - >;<br>EMBASE <1996 - >;<br>OVID MEDLINE® In-Process & Other Non-Indexed Citations;<br>OVID MEDLINE® <1966- ><br>* Note: Subject headings have been customized for each database. |
| Date of Search: | December 18, 2006                                                                                                                                                                                        |
| Alerts:         | Monthly search updates began January 2007 and ran to April 2007.                                                                                                                                         |
| Study Types:    | Randomized controlled trials                                                                                                                                                                             |
| Limits:         | Publication years 1990 onward<br>Humans                                                                                                                                                                  |

### SYNTAX GUIDE

|      |                                                                           |
|------|---------------------------------------------------------------------------|
| /    | At the end of a phrase, searches the phrase as a subject heading          |
| .sh  | At the end of a phrase, searches the phrase as a subject heading          |
| MeSH | Medical Subject Heading                                                   |
| fs   | Floating subheading                                                       |
| exp  | Explode a subject heading                                                 |
| \$   | Truncation symbol, or wildcard: retrieves plural or variations of a word  |
| *    | Indicates that the marked subject heading is a primary topic              |
| ?    | Truncation symbol for one or no characters only                           |
| ADJ  | Requires words are adjacent to each other (in any order)                  |
| ADJ# | Adjacency within # number of words (in any order)                         |
| .ti  | Title                                                                     |
| .ab  | Abstract                                                                  |
| .hw  | Heading Word; usually includes subject headings and controlled vocabulary |
| .pt  | Publication type                                                          |
| .rn  | CAS registry number                                                       |
| .af  | All fields                                                                |

**MULTIFILE SEARCH STRATEGIES:  
Medline, Medline Daily Update, Medline In-Process, EMBASE, BIOSIS Previews**

**Search Syntax:**

1. Long-acting insulin AND Short-acting insulin AND RCT Filter
2. Glargine AND Detemir AND RCT Filter

**Supplemental Search 1: LA and RA:**

**Long-Acting Insulin**

1. Insulin Long-Acting/aa
2. (long acting insulin\$ or long acting analog\$ or slow\$ acting insulin\$ or slow\$ acting analog\$).ti,ab,hw.
3. (glargine or Lantus or Optisulin or hoe 901 or 160337-95-1).ti,ab,rn,tn,hw.
4. (detemir or determir or Levemir or nn 304 or 169148-63-4).ti,ab,rn,tn,hw.
5. or/1-4

**Rapid-Acting Insulin**

6. (short acting insulin\$ or quick acting insulin\$ or rapid acting insulin\$ or rapidly acting insulin\$ or fast acting insulin\$ or quick acting analog\$ or rapid acting analog\$ or rapidly acting analog\$ or short acting analog\$ or fast acting analog\$).ti,ab,hw.
7. (Lispro or Lyspro or Humalog or Liprolog or "Lys(B28),pro(B29)or 133107-64-9").ti,ab,rn,tn,hw.
8. (Insulin Aspart or "Asp(B28)" or 116094-23-6 or NovoLog or NovoRapid or NovoMix).ti,ab,rn,tn,hw.
9. (Glulisine or 207748-29-6 or Apidra).ti,ab,rn,tn,hw.
10. or/6-9

**Supplemental Search 2: Glargine versus Detemir**

- (glargine or Lantus or Optisulin or hoe 901 or 160337-95-1).ti,ab,rn,tn,hw  
(detemir or determir or Levemir or nn 304 or 169148-63-4).ti,ab,rn,tn,hw

**RCT Filters:**

**MedLine**

16. Randomized Controlled Trial.pt.
17. Randomized Controlled Trials/
18. (random\$ or sham\$ or placebo\$ or (singl\$ adj (blind\$ or dumm\$ or mask\$)) or (doubl\$ adj (blind\$ or dumm\$ or mask\$))).ti,ab.
19. ((tripl\$ adj (blind\$ or dumm\$ or mask\$)) or (trebl\$ adj (blind\$ or dumm\$ or mask\$))).ti,ab.
20. (randomi?ed control\$ trial? or rct?).ti,ab.
21. or/16-20

**EMBASE**

22. Randomized Controlled Trial/
23. (random\$ or sham\$ or placebo\$ or (singl\$ adj (blind\$ or dumm\$ or mask\$)) or (doubl\$ adj (blind\$ or dumm\$ or mask\$))).ti,ab.

24. ((tripl\$ adj (blind\$ or dumm\$ or mask\$)) or (trebl\$ adj (blind\$ or dumm\$ or mask\$))).ti,ab.  
25. (randomi?ed control\$ trial? or rct?).ti,ab.  
26. or/22-25

### **BIOSIS Previews**

27. randomi?ed control\$ trial?.ti,ab,hw.  
28. (random\$ or sham\$ or placebo\$ or (singl\$ adj (blind\$ or dumm\$ or mask\$)) or (doubl\$ adj (blind\$ or dumm\$ or mask\$))).ti,ab,hw.  
29. ((tripl\$ adj (blind\$ or dumm\$ or mask\$)) or (trebl\$ adj (blind\$ or dumm\$ or mask\$))).ti,ab,hw.  
30. or/27-29

## **OTHER DATABASES**

Cochrane Library  
Issues 3, 2007

ECRI [www.ecri.org](http://www.ecri.org)

Same MeSH, keywords, and date limits used as per Medline search, excluding study types and Human restrictions. Syntax adjusted for Cochrane Library databases.
