# Supplementary material
Source: PubMed Central journal article supplement (PMC2638025)
Supplement: supp_180_4_385_v2_3.pdf [file supp_180_4_385_v2_3.pdf]

**Appendix 3 (as supplied by the authors): Supplemental Search for rapid-acting insulin analogues**

| <b>OVERVIEW</b>     |                                                                                                                                                                                                          |
|---------------------|----------------------------------------------------------------------------------------------------------------------------------------------------------------------------------------------------------|
| Interface:          | OVID                                                                                                                                                                                                     |
| Databases:          | BIOSIS Previews <1989 - >;<br>EMBASE <1996 - >;<br>OVID MEDLINE® In-Process & Other Non-Indexed Citations;<br>OVID MEDLINE® <1966- ><br>* Note: Subject headings have been customized for each database. |
| Date of Search:     | December 18, 2006                                                                                                                                                                                        |
| Alerts:             | Monthly search updates began January 2007 and ran to April 2007.                                                                                                                                         |
| Study Types:        | Randomized controlled trials                                                                                                                                                                             |
| Limits:             | Publication years 1990 onward<br>Humans                                                                                                                                                                  |
| <b>SYNTAX GUIDE</b> |                                                                                                                                                                                                          |
| /                   | At the end of a phrase, searches the phrase as a subject heading                                                                                                                                         |
| .sh                 | At the end of a phrase, searches the phrase as a subject heading                                                                                                                                         |
| MeSH                | Medical Subject Heading                                                                                                                                                                                  |
| fs                  | Floating subheading                                                                                                                                                                                      |
| exp                 | Explode a subject heading                                                                                                                                                                                |
| \$                  | Truncation symbol, or wildcard: retrieves plural or variations of a word                                                                                                                                 |
| *                   | Indicates that the marked subject heading is a primary topic                                                                                                                                             |
| ?                   | Truncation symbol for one or no characters only                                                                                                                                                          |
| ADJ                 | Requires words are adjacent to each other (in any order)                                                                                                                                                 |
| ADJ#                | Adjacency within # number of words (in any order)                                                                                                                                                        |
| .ti                 | Title                                                                                                                                                                                                    |
| .ab                 | Abstract                                                                                                                                                                                                 |
| .hw                 | Heading Word; usually includes subject headings and controlled vocabulary                                                                                                                                |
| .pt                 | Publication type                                                                                                                                                                                         |
| .rn                 | CAS registry number                                                                                                                                                                                      |
| .af                 | All fields                                                                                                                                                                                               |

**SEARCH STRATEGIES:****MedLine, MedLine Daily Update, MedLine In-Process, EMBASE, BIOSIS Previews****Search Syntax:**

Lispro AND Aspart AND RCT Filter  
Lispro AND Glulisine AND RCT Filter  
Aspart AND Glulisine AND RCT Filter

**MedLine, MedLine Daily Update, MedLine In-process**

1. Lispro\$.ti,ab,rn.
2. Lyspro\$.ti,ab,rn.
3. 133107-64-9.ti,ab,rn.
4. (Humalog or Liprolog).ti,ab,rn.
5. "Lys(B28),pro(B29)".ti,ab,rn.
6. or/1-5
7. Aspart.ti,ab.
8. (insulin aspart or Insulin AspB28).ti,ab,rn.
9. (asp adj b28).ti,ab,rn.
10. 116094-23-6.ti,ab,rn.
11. (NovoLog or NovoRapid or NovoMix).ti,ab,rn.
12. or/7-11
13. Glulisine.af.
14. 207748-29-6.ti,ab,rn.
15. Apidra.ti,ab,rn.
16. or/13-15
  
21. Randomized Controlled Trial.pt.
22. Randomized Controlled Trials/
23. (random\$ or sham\$ or placebo\$ or (singl\$ adj (blind\$ or dumm\$ or mask\$)) or (doubl\$ adj (blind\$ or dumm\$ or mask\$))).ti,ab.
24. ((tripl\$ adj (blind\$ or dumm\$ or mask\$)) or (trebl\$ adj (blind\$ or dumm\$ or mask\$))).ti,ab.
25. (randomi?ed control\$ trial? or rct?).ti,ab.
26. or/21-25
27. 20 and 26

**EMBASE**

28. Insulin lispro/
29. "insulin[b28 lysine b29 proline]"/
30. Lispro\$.ti,ab,rn,tn,hw.
31. Lyspro\$.ti,ab,rn,tn,hw.
32. 133107-64-9.ti,ab,rn.
33. (Humalog or Liprolog).ti,ab,rn,tn,hw.
34. "Lys(B28),pro(B29)".ti,ab,rn,tn,hw.
35. or/28-34

**SEARCH STRATEGIES:****MedLine, MedLine Daily Update, MedLine In-Process, EMBASE, BIOSIS Previews**

36. Insulin aspart/
37. aspart.ti,ab,rn,tn,hw.
38. (asp adj b28).ti,ab,rn,tn,hw.
39. 116094-23-6.ti,ab,rn.
40. (NovoLog or NovoRapid or NovoMix).ti,ab,rn,tn,hw.
41. or/36-40
42. Insulin Glulisine/
43. Glulisine/
44. Glulisine.ti,ab,rn,tn,hw.
45. Apidra.ti,ab,rn,tn,hw.
46. 207748-29-6.ti,ab,rn.
47. or/42-46
48. 35 and 41
49. 35 and 47
50. 41 and 47
51. or/48-50
52. Randomized Controlled Trial/
53. (random\$ or sham\$ or placebo\$ or (singl\$ adj (blind\$ or dumm\$ or mask\$)) or (doubl\$ adj (blind\$ or dumm\$ or mask\$))).ti,ab.
54. ((tripl\$ adj (blind\$ or dumm\$ or mask\$)) or (trebl\$ adj (blind\$ or dumm\$ or mask\$))).ti,ab.
55. (randomi?ed control\$ trial? or rct?).ti,ab.
56. or/52-55
57. 51 and 56

**BIOSIS**

58. Insulin lispro.ti,ab,hw.
59. "insulin[b28 lysine b29 proline]".ti,ab,hw.
60. Lispro\$.ti,ab,hw.
61. Lyspro\$.ti,ab,hw.
62. 133107-64-9.ti,ab,hw.
63. (Humalog or Liprolog).ti,ab,hw.
64. "Lys(B28),pro(B29)".ti,ab,rn.
65. or/58-64
66. Insulin Aspart.ti,ab,hw.
67. (asp adj b28).ti,ab,hw.
68. 116094-23-6.ti,ab,hw.
69. (NovoLog or NovoRapid or NovoMix).ti,ab,hw.
70. or/66-69
71. Glulisine.af.
72. Apidra.af.
73. 207748-29-6.ti,ab,hw.
74. or/71-73

**SEARCH STRATEGIES:****MedLine, MedLine Daily Update, MedLine In-Process, EMBASE, BIOSIS Previews**

75. 65 and 70

76. 65 and 74

77. 70 and 74

78. or/75-77

79. randomi?ed control\$ trial?.ti,ab,hw.

80. (random\$ or sham\$ or placebo\$ or (singl\$ adj (blind\$ or dumm\$ or mask\$)) or (doubl\$ adj (blind\$ or dumm\$ or mask\$))).ti,ab,hw.

81. (((tripl\$ adj (blind\$ or dumm\$ or mask\$)) or (trebl\$ adj (blind\$ or dumm\$ or mask\$))).ti,ab,hw.

82. or/79-81

83. 78 and 82

**OTHER DATABASES**

Cochrane Library  
Issues 3, 2007

Same MeSH, keywords, and date limits used as per MedLine search, excluding study types and human restrictions. Syntax adjusted for Cochrane Library databases.

ECRI  
www.ecri.org
