# Supplementary material
Source: PubMed Central journal article supplement (PMC2638025)
Supplement: supp_180_4_385_v2_4.pdf [file supp_180_4_385_v2_4.pdf]

## **Appendix 4 (as supplied by the authors: Grey literature search for rapid-acting and long-acting insulin analogues)**

### **GREY LITERATURE AND HANDSEARCHING**

Dates for search: August 2005 – June 2007

Keywords: Rapid acting insulin; long acting insulin; insulin brand names and substance names

This section lists the main agencies, organizations, and web sites searched; it is not a complete list.

#### **Health Technology Assessment Agencies**

Alberta Heritage Foundation for Medical Research (AHFMR)  
<http://www.ahfmr.ab.ca>

Agence d'évaluation des technologies et des modes d'intervention en santé (AETMIS), Québec  
<http://www.aetmis.gouv.qc.ca>

Canadian Agency for Drugs and Technologies in Health (CADTH)  
<http://www.cadth.ca>

Centre for Evaluation of Medicines (Father Sean O'Sullivan Research Centre, St. Joseph's Healthcare, Hamilton; and McMaster University, Faculty of Health Sciences, Hamilton, Ontario)  
<http://www.thecem.net/>

Centre for Health Services and Policy Research, University of British Columbia  
<http://www.chspr.ubc.ca/cgi-bin/pub>

Health Quality Council of Alberta (HQCA)  
<http://www.hqca.ca>

Health Quality Council, Saskatchewan.  
<http://www.hqc.sk.ca/>

Institute for Clinical Evaluative Sciences (ICES), Ontario  
<http://www.ices.on.ca/>

Institute of Health Economics (IHE), Alberta  
<http://www.ihe.ab.ca/>

Manitoba Centre for Health Policy (MCHP)  
<http://www.umanitoba.ca/centres/mchp/>

Ontario Ministry of Health and Long-Term Care, Health Technology Reviews  
[http://www.health.gov.on.ca/english/providers/program/mas/tech/tech\\_mn.html](http://www.health.gov.on.ca/english/providers/program/mas/tech/tech_mn.html)

The Technology Assessment Unit of the McGill University Health Centre  
<http://www.mcgill.ca/tau/>

Therapeutics Initiative, Evidence-Based Drug Therapy, University of British Columbia  
<http://www.ti.ubc.ca>

Health Technology Assessment International (HTAi)  
<http://www.htai.org>

International Network for Agencies for Health Technology Assessment (INAHTA)  
<http://www.inahta.org>

WHO Health Evidence Network  
<http://www.euro.who.int/HEN>

Australian Safety and Efficacy Register of New Interventional Procedures – Surgical (ASERNIP-S)  
<http://www.surgeons.org/Content/NavigationMenu/Research/ASERNIPS/default.htm>

Centre for Clinical Effectiveness (Monash University)  
<http://www.med.monash.edu.au/healthservices/cce/>

Medicare Services Advisory Committee (Department of Health and Aging)  
<http://www.msac.gov.au/>

NPS RADAR (National Prescribing Service Ltd.)  
[http://www.npsradar.org.au/site.php?page=1&content=/npsradar%2Fcontent%2Farchive\\_alpha.html](http://www.npsradar.org.au/site.php?page=1&content=/npsradar%2Fcontent%2Farchive_alpha.html)

ITA – Institute of Technology Assessment  
<http://www.oeaw.ac.at/ita/index.htm>

Danish Centre for Evaluation and Health Technology Assessment (DCEHTA), National Board of Health  
<http://www.dihta.dk/>

Finnish Office for Health Care Technology and Assessment (FinOHTA), National Research and Development Centre for Welfare and Health  
<http://finohta.stakes.fi/EN/index.htm>  
 L'Agence nationale d'accréditation et d'évaluation en santé (ANAES), Ministère de la Santé, de la Famille, et des Personnes handicapées  
<http://www.anaes.fr/anaes/anaesparametrage.nsf/HomePage?ReadForm>

Committee for Evaluation and Diffusion of Innovative Technologies (CEDIT)  
[http://cedit.aphp.fr/english/index\\_present.html](http://cedit.aphp.fr/english/index_present.html)

German Institute for Medical Documentation and Information (DIMDI), Federal Ministry of Health

<http://www.dimdi.de/static/de/hta/db/index.htm>

Health Service Executive

<http://www.hebe.ie/ProgrammesProjects/HealthTechnologyAssessment>

College voor Zorgverzekeringen/Health Care Insurance Board (CVZ)

<http://www.cvz.nl>

Health Council of the Netherlands

<http://www.gr.nl>

New Zealand Health Technology Assessment Clearing House for Health Outcomes and Health Technology Assessment (NZHTA)

<http://nzhta.chmeds.ac.nz/>

Norwegian Centre for Health Technology Assessment (SMM)

<http://www.kunnskapsenteret.no/index.php?show=38&expand=14,38>

Agencia de Evaluación de Tecnologías Sanitarias (AETS), Instituto de Salud “Carlos III”/Health Technology Assessment Agency

[http://www.isciii.es/htdocs/investigacion/Agencia\\_quees.jsp](http://www.isciii.es/htdocs/investigacion/Agencia_quees.jsp)

Basque Office for Health Technology Assessment (OSTEBA), Departamento de Sanidad

<http://www.osasun.ejgv.euskadi.net/r52-2536/es/>

Catalan Agency for Health Technology Assessment and Research (CAHTA)

<http://www.aatrm.net/html/en/Du8/doc7850.html>

CMT – Centre for Medical Technology Assessment

<http://www.cmt.liu.se/pub/jsp/polopoly.jsp?d=6199&l=en>

Swedish Council on Technology Assessment in Health Care (SBU)

<http://www.sbu.se/www/index.asp>

Swiss Network for Health Technology Assessment

<http://www.snhta.ch/about/index.php>

European Information Network on New and Changing Health Technologies (EUROSCAN), University of Birmingham, National Horizon Scanning Centre

<http://www.euroscan.bham.ac.uk>

National Horizon Scanning Centre (NHSC)

<http://www.pcpoh.bham.ac.uk/publichealth/horizon>

NHS Health Technology Assessment /National Coordinating Centre for Health Technology Assessment (NCCHTA), Department of Health R&D Division  
<http://www.hta.nhsweb.nhs.uk>

NHS National Institute for Clinical Excellence (NICE)  
<http://www.nice.org.uk>

NHS Quality Improvement Scotland  
<http://www.nhshealthquality.org>

University of York NHS Centre for Reviews and Dissemination (NHS CRD)  
<http://www.york.ac.uk/inst/crd>

The Wessex Institute for Health Research and Development, Succinct and Timely Evaluated Evidence Review (STEER)  
<http://www.wihrd.soton.ac.uk/>

West Midlands Health Technology Assessment Collaboration (WMHTAC)  
<http://www.publichealth.bham.ac.uk/wmhtac/>

Agency for Healthcare Research and Quality (AHRQ)  
<http://www.ahrq.gov/>

Department of Veterans Affairs Research & Development, general publications  
[http://www1.va.gov/resdev/prt/pubs\\_individual.cfm?webpage=pubs\\_ta\\_reports.htm](http://www1.va.gov/resdev/prt/pubs_individual.cfm?webpage=pubs_ta_reports.htm)

VA Technology Assessment Program (VATAP)  
<http://www.va.gov/vatap/>

Institute for Clinical Systems Improvement  
<http://www.icsi.org/index.asp>

Technology Evaluation Center (Tec). BlueCross BlueShield Association  
<http://www.bluecares.com/tec/index.html>

University HealthSystem Consortium (UHC)  
<http://www.uhc.edu/>

### **Health Economic**

Bases CODECS (COonnaissances et Décision en EConomie de la Santé) Collège des Economistes de la Santé/INSERM  
[http://www.inserm.fr/codecs/codecsanglais.nsf/\(Web+English+Startup+Page\)?OpenForm](http://www.inserm.fr/codecs/codecsanglais.nsf/(Web+English+Startup+Page)?OpenForm)

Centre for Health Economics and Policy Analysis (CHEPA), Department of Clinical Epidemiology and Biostatistics, Faculty of Health Sciences. McMaster University, Canada  
<http://www.chepa.org>

Health Economics Research Group (HERG), Brunel University, UK  
<http://www.brunel.ac.uk/about/acad/herg>

Health Economics Research Unit (HERU), University of Aberdeen  
<http://www.abdn.ac.uk/heru/>

The Hospital for Sick Children (Toronto), PEDE Database  
<http://pede.bioinfo.sickkids.on.ca/pede/index.jsp>

University of Connecticut, Department of Economics, RePEc database  
<http://ideas.repec.org>

## **Conferences**

Endocrine abstracts  
<http://www.endocrine-abstracts.org/ea/default.htm>

American Association of Clinical Endocrinologists Annual Meeting and Clinical Congress (AACE) <http://www.aace.com/calendar.php>

American Diabetes Association (ADA) Scientific Sessions  
<http://scientificsessions.diabetes.org/index.cfm?fuseaction=Custom.Content&MenuID=1000>

European Association for the Study of Diabetes, Annual Meeting  
<http://www.easd.org/>

Association of British Clinical Diabetologists  
[www.diabetologists.org.uk](http://www.diabetologists.org.uk)

ENDO (Endocrine Society) Conference  
<http://www.abstracts2view.com/endo/>

## **Societies/Organizations/Associations**

Canadian Diabetes Association  
<http://www.diabetes.ca/>

American Diabetes Association  
<http://www.diabetes.org>

## **Search Engines**

Google  
<http://www.google.ca/>
