# Supplementary material
Source: PubMed Central journal article supplement (PMC2638025)
Supplement: supp_180_4_385_v2_5.pdf [file supp_180_4_385_v2_5.pdf]

**Appendix 5 (as supplied by the authors): Methodological quality of randomized controlled trials of rapid-acting insulin analogues in type 1 diabetes.**

| Study*                                            | Jadad score for: |                    |                             | Total<br>Jadad<br>score | Allocation<br>Concealment<br>? | Blinding<br>of<br>Outcome<br>Assessor? | Intent-to-<br>Treat<br>analysis? | Number<br>of<br>Patients | Dropouts<br>N (%) |
|---------------------------------------------------|------------------|--------------------|-----------------------------|-------------------------|--------------------------------|----------------------------------------|----------------------------------|--------------------------|-------------------|
|                                                   | Randomization    | Double<br>Blinding | Withdrawals<br>and Dropouts |                         |                                |                                        |                                  |                          |                   |
| Anderson <i>et al.</i> ,<br>1997 <sup>24</sup>    | 1                | 0                  | 0                           | 1                       | Unclear                        | NR                                     | Yes                              | 1,008                    | 48 (4.8%)         |
| Anderson <i>et al.</i> ,<br>1997 <sup>36</sup>    | 1                | 0                  | 0                           | 1                       | Unclear                        | NR                                     | Yes                              | 336 type 1               | 151(45%)          |
| Annuzzi <i>et al.</i> ,<br>2001 <sup>25</sup>     | 1                | 0                  | 0                           | 1                       | Unclear                        | NR                                     | NR                               | 85                       | 5 (5.9%)          |
| Bode and Strange,<br>2001 <sup>28</sup>           | 1                | 0                  | 1                           | 2                       | Unclear                        | NR                                     | NR                               | 29                       | 1 (3.4%)          |
| Bode <i>et al.</i> , 2002 <sup>27</sup>           | 1                | 0                  | 1                           | 2                       | Unclear                        | NR                                     | NR                               | 146                      | 14 (9.6%)         |
| Bott <i>et al.</i> , 2003 <sup>29</sup>           | 1                | 0                  | 0                           | 1                       | Unclear                        | NR                                     | NR                               | 424                      | NR                |
| Caixàs <i>et al.</i> , 1998 <sup>30</sup>         | 1                | 0                  | 0                           | 1                       | Unclear                        | NR                                     | NR                               | 10                       | NR                |
| Chan <i>et al.</i> , 2004 <sup>33</sup>           | 1                | 0                  | 0                           | 1                       | Unclear                        | NR                                     | NR                               | 12 type 1                | NR                |
| Ciofetta <i>et al.</i> , 1999 <sup>31</sup>       | 1                | 0                  | 0                           | 1                       | Unclear                        | NR                                     | NR                               | 24                       | NR                |
| Deeb <i>et al.</i> , 2001 <sup>63</sup>           | 1                | 0                  | 1                           | 2                       | Unclear                        | NR                                     | NR                               | 61                       | 2 (3.3%)          |
| Del Sindaco <i>et al.</i> ,<br>1998 <sup>64</sup> | 1                | 0                  | 0                           | 1                       | Unclear                        | NR                                     | NR                               | 69                       | NR                |
| Fairchild <i>et al.</i> ,<br>2000 <sup>19</sup>   | 1                | 0                  | 1                           | 2                       | Unclear                        | NR                                     | NR                               | 70                       | 0                 |
| Ferguson <i>et al.</i> ,<br>2001 <sup>65</sup>    | 1                | 0                  | 1                           | 2                       | Unclear                        | NR                                     | NR                               | 39                       | 5 (12.8%)         |
| Ford-Adams <i>et al.</i> ,<br>2003 <sup>66</sup>  | 1                | 0                  | 1                           | 2                       | Adequate                       | Partially                              | Yes                              | 23                       | None              |
| Gale, 2000 <sup>67</sup>                          | 1                | 2                  | 1                           | 4                       | Unclear                        | Yes                                    | Yes                              | 93                       | 6 (6.5%)          |
| Garg <i>et al.</i> , 1996 <sup>68</sup>           | 1                | 0                  | 1                           | 2                       | Unclear                        | NR                                     | No                               | 39                       | 2 (5.1%)          |

| Study*                                        | Jadad score for: |                    |                             | Total<br>Jadad<br>score | Allocation<br>Concealment<br>? | Blinding<br>of<br>Outcome<br>Assessor? | Intent-to-<br>Treat<br>analysis? | Number<br>of<br>Patients | Dropouts<br>N (%) |
|-----------------------------------------------|------------------|--------------------|-----------------------------|-------------------------|--------------------------------|----------------------------------------|----------------------------------|--------------------------|-------------------|
|                                               | Randomization    | Double<br>Blinding | Withdrawals<br>and Dropouts |                         |                                |                                        |                                  |                          |                   |
| Hedman <i>et al.</i> , 2001 <sup>69</sup>     | 1                | 0                  | 1                           | 2                       | Unclear                        | NR                                     | Yes                              | 12                       | None              |
| Heller <i>et al.</i> , 1999 <sup>70</sup>     | 1                | 0                  | 1                           | 2                       | Unclear                        | NR                                     | Yes                              | 135                      | 1 (0.7%)          |
| Heller <i>et al.</i> , 2004 <sup>71</sup>     | 2                | 1                  | 1                           | 4                       | Adequate                       | NR                                     | NR                               | 155                      | 16<br>(10.3%)     |
| Holcombe <i>et al.</i> , 2002 <sup>72</sup>   | 1                | 0                  | 1                           | 2                       | Unclear                        | NR                                     | Yes                              | 481                      | 18 (3.7%)         |
| Holleman <i>et al.</i> , 1997 <sup>73</sup>   | 1                | 0                  | 1                           | 2                       | Unclear                        | NR                                     | Yes                              | 199                      | 10 (5.0%)         |
| Home <i>et al.</i> , 1998 <sup>74</sup>       | 1                | 1                  | 1                           | 3                       | Unclear                        | NR                                     | Yes                              | 104                      | 14<br>(13.5%)     |
| Home <i>et al.</i> , 2000 <sup>75</sup>       | 1                | 0                  | 1                           | 2                       | Unclear                        | NR                                     | Yes                              | 1070                     | 59 (5.5%)         |
| Home <i>et al.</i> , 2006 <sup>76</sup>       | 1                | 0                  | 1                           | 2                       | Unclear                        | NR                                     | Yes                              | 753                      | 155 (21%)         |
| Iwamoto <i>et al.</i> , 2001 <sup>77</sup>    | 1                | 0                  | 0                           | 1                       | Unclear                        | NR                                     | Yes                              | 211                      | 15 (7.1%)         |
| Jacobs <i>et al.</i> , 1997 <sup>78</sup>     | 1                | 0                  | 0                           | 1                       | Unclear                        | NR                                     | NR                               | 12                       | NR                |
| Jansson <i>et al.</i> , 1998 <sup>80</sup>    | 1                | 0                  | 0                           | 1                       | Unclear                        | NR                                     | NR                               | 84                       | NR                |
| Johansson <i>et al.</i> , 2000 <sup>81</sup>  | 1                | 0                  | 1                           | 2                       | Unclear                        | NR                                     | Yes                              | 41                       | 0                 |
| Kotsanos <i>et al.</i> , 1997 <sup>39</sup>   | 1                | 0                  | 1                           | 2                       | Unclear                        | NR                                     | NR                               | 468 type 1               | 26 (2.8%)         |
| Melki <i>et al.</i> , 1998 <sup>83</sup>      | 1                | 0                  | 1                           | 2                       | Unclear                        | NR                                     | NR                               | 39                       | 1 (2.5%)          |
| Provenzano <i>et al.</i> , 2001 <sup>85</sup> | 2                | 0                  | 0                           | 2                       | Unclear                        | NR                                     | NR                               | 12                       | NR                |
| Raskin <i>et al.</i> , 2001 <sup>87</sup>     | 1                | 0                  | 1                           | 2                       | Unclear                        | NR                                     | Yes                              | 58                       | 4 (6.9%)          |

| Study*                                             | Jadad score for: |                    |                             | Total<br>Jadad<br>score | Allocation<br>Concealment<br>? | Blinding<br>of<br>Outcome<br>Assessor? | Intent-to-<br>Treat<br>analysis? | Number<br>of<br>Patients | Dropouts<br>N (%)                                                                    |
|----------------------------------------------------|------------------|--------------------|-----------------------------|-------------------------|--------------------------------|----------------------------------------|----------------------------------|--------------------------|--------------------------------------------------------------------------------------|
|                                                    | Randomization    | Double<br>Blinding | Withdrawals<br>and Dropouts |                         |                                |                                        |                                  |                          |                                                                                      |
| Raskin <i>et al.</i> , 2000 <sup>86</sup>          | 1                | 0                  | 1                           | 2                       | Unclear                        | NR                                     | Yes                              | 882                      | 67 (7.6%)<br>after 6<br>months;<br>additional<br>39 after<br>subsequen<br>t 6 months |
| Recasens <i>et al.</i> ,<br>2003 <sup>88</sup>     | 1                | 0                  | 0                           | 1                       | Unclear                        | NR                                     | NR                               | 45                       | NR                                                                                   |
| Renner <i>et al.</i> ,<br>1999 <sup>89</sup>       | 1                | 0                  | 0                           | 1                       | Unclear                        | NR                                     | NR                               | 113                      | NR                                                                                   |
| Roach <i>et al.</i> , 1999 <sup>48</sup>           | 1                | 0                  | 1                           | 2                       | Unclear                        | No                                     | Yes                              | 37 type 1                | 3 (3.0%)                                                                             |
| Schmauss <i>et al.</i> ,<br>1998 <sup>42</sup>     | 1                | 0                  | 1                           | 2                       | Unclear                        | NR                                     | Yes                              | 11                       | 0                                                                                    |
| Tamás <i>et al.</i> , 2001 <sup>57</sup>           | 2                | 0                  | 0                           | 2                       | Unclear                        | NR                                     | Yes                              | 426                      | 16 (3.5%)                                                                            |
| Tubiana-Rufi <i>et al.</i> ,<br>2004 <sup>58</sup> | 1                | 0                  | 1                           | 2                       | Unclear                        | NR                                     | No                               | 29                       | 2 (6.9%)                                                                             |
| Tupola <i>et al.</i> ,<br>2001 <sup>43</sup>       | 1                | 0                  | 1                           | 2                       | Unclear                        | NR                                     | No                               | 24                       | 2 (8.3%)                                                                             |
| Valle <i>et al.</i> , 2001 <sup>59</sup>           | 1                | 0                  | 0                           | 1                       | Unclear                        | NR                                     | Yes                              | 1,184                    | NR                                                                                   |
| Vignati <i>et al.</i> ,<br>1997 <sup>44</sup>      | 2                | 0                  | 1                           | 3                       | Unclear                        | NR                                     | NR                               | 379 type 1               | 29 (4.1%)                                                                            |
| Zinman <i>et al.</i> ,<br>1997 <sup>45</sup>       | 1                | 1                  | 1                           | 3                       | Unclear                        | NR                                     | Yes                              | 30                       | 0                                                                                    |

NR=not reported.

\*Citations of the studies are listed in the main article, available at [www.cmaj.ca/cgi/content/full/180/4/385](http://www.cmaj.ca/cgi/content/full/180/4/385).
