# Supplementary material
Source: PubMed Central journal article supplement (PMC2638025)
Supplement: supp_180_4_385_v2_7.pdf [file supp_180_4_385_v2_7.pdf]

**Appendix 7 (as supplied by the authors): Methodological quality of randomized controlled trials of rapid-acting insulin analogues in pregnant women with diabetes.**

| Study*                                          | Jadad score for: |                    |                             | Total<br>Jadad<br>score | Allocation<br>Concealment<br>? | Blinding<br>of<br>Outcome<br>Assessor? | Intent-to-<br>Treat<br>analysis? | Number<br>of<br>Patients | Dropouts<br>N (%) |
|-------------------------------------------------|------------------|--------------------|-----------------------------|-------------------------|--------------------------------|----------------------------------------|----------------------------------|--------------------------|-------------------|
|                                                 | Randomization    | Double<br>Blinding | Withdrawals<br>and Dropouts |                         |                                |                                        |                                  |                          |                   |
| Jovanovic <i>et al.</i> ,<br>1999 <sup>46</sup> | 2                | 0                  | 0                           | 2                       | Unclear                        | NR                                     | NR                               | 42                       | 1 (2%)            |
| Mathiesen <i>et al.</i> ,<br>2007 <sup>22</sup> | 1                | 0                  | 1                           | 2                       | Unclear                        | NR                                     | Yes                              | 322                      | 58 (18%)          |
| Mecacci <i>et al.</i> ,<br>2003 <sup>40</sup>   | 1                | 0                  | 1                           | 2                       | Unclear                        | NR                                     | No                               | 49                       | NR                |
| Persson <i>et al.</i> ,<br>2002 <sup>84</sup>   | 1                | 0                  | 0                           | 1                       | Unclear                        | NR                                     | Yes                              | 33                       | NR                |

NR=not reported.

\*Citations of the studies are listed in the main article, available at [www.cmaj.ca/cgi/content/full/180/4/385](http://www.cmaj.ca/cgi/content/full/180/4/385).
