# Supplementary material
Source: PubMed Central journal article supplement (PMC2638025)
Supplement: supp_180_4_385_v2_8.pdf [file supp_180_4_385_v2_8.pdf]

**Appendix 8: Methodological quality of randomized controlled trials of long-acting insulin analogues in type 1 diabetes.**

| Study*                                           | Jadad score for: |                    |                                | Total<br>Jadad<br>score | Allocation<br>Concealment? | Blinding<br>of<br>Outcome<br>Assessor? | Intent-to-<br>Treat<br>analysis? | Number<br>of<br>Patients | Dropouts<br>N (%) |
|--------------------------------------------------|------------------|--------------------|--------------------------------|-------------------------|----------------------------|----------------------------------------|----------------------------------|--------------------------|-------------------|
|                                                  | Randomization    | Double<br>Blinding | Withdrawals<br>and<br>Dropouts |                         |                            |                                        |                                  |                          |                   |
| Ashwell <i>et al.</i> ,<br>2006 <sup>93</sup>    | 2                | 0                  | 1                              | 3                       | Adequate                   | No                                     | No                               | 54                       | 3 (5.6)           |
| De Leeuw <i>et al.</i> ,<br>2005 <sup>115</sup>  | 1                | 0                  | 1                              | 2                       | Unclear                    | NR                                     | Yes                              | 315                      | 8 (2.53)          |
| Fulcher <i>et al.</i> ,<br>2005 <sup>116</sup>   | 1                | 0                  | 1                              | 2                       | Unclear                    | Partially                              | Yes                              | 125                      | 18 (14.4)         |
| Hermansen <i>et al.</i> ,<br>2001 <sup>117</sup> | 1                | 0                  | 1                              | 2                       | Unclear                    | Partially                              | No                               | 59                       | 3 (5.1)           |
| Hermansen <i>et al.</i> ,<br>2004 <sup>95</sup>  | 1                | 0                  | 1                              | 2                       | Unclear                    | No                                     | Yes                              | 595                      | 23 (3.87)         |
| Hershon <i>et al.</i> ,<br>2004 <sup>118</sup>   | 1                | 0                  | 1                              | 2                       | Unclear                    | NR                                     | Yes                              | 394                      | 40 (10.2)         |
| Home <i>et al.</i> , 2005 <sup>119</sup>         | 2                | 0                  | 1                              | 3                       | Unclear                    | NR                                     | Yes                              | 585                      | 37 (6.32)         |
| Home <i>et al.</i> , 2004 <sup>120</sup>         | 2                | 0                  | 1                              | 3                       | Unclear                    | NR                                     | Yes                              | 408                      | 17(4.2)           |
| Kolendorf <i>et al.</i> ,<br>2006 <sup>90</sup>  | 1                | 0                  | 1                              | 2                       | Unclear                    | No                                     | No                               | 131                      | 7 (5.34)          |
| Kudva <i>et al.</i> ,<br>2005 <sup>122</sup>     | 2                | 0                  | 1                              | 3                       | Adequate                   | Partially                              | No                               | 24                       | 2 (8.33)          |
| Murphy <i>et al.</i> ,<br>2003 <sup>96</sup>     | 1                | 0                  | 1                              | 2                       | Unclear                    | No                                     | No                               | 26                       | 1 (3.85)          |
| Pieber <i>et al.</i> ,<br>2000 <sup>112</sup>    | 1                | 0                  | 1                              | 2                       | Unclear                    | NR                                     | NR                               | 333                      | 0 (0)             |
| Pieber <i>et al.</i> ,<br>2005 <sup>123</sup>    | 2                | 0                  | 1                              | 3                       | Unclear                    | NR                                     | Yes                              | 400                      | 21 (5.25)         |
| Pieber <i>et al.</i> ,<br>2007 <sup>141</sup>    | 1                | 0                  | 1                              | 2                       | Adequate                   | No                                     | No                               | 320                      | 29(9.0)           |

| Study*                                               | Jadad score for: |                    |                             | Total<br>Jadad<br>score | Allocation<br>Concealment? | Blinding<br>of<br>Outcome<br>Assessor? | Intent-to-<br>Treat<br>analysis? | Number<br>of<br>Patients | Dropouts<br>N (%) |
|------------------------------------------------------|------------------|--------------------|-----------------------------|-------------------------|----------------------------|----------------------------------------|----------------------------------|--------------------------|-------------------|
|                                                      | Randomization    | Double<br>Blinding | Withdrawals<br>and Dropouts |                         |                            |                                        |                                  |                          |                   |
| Porcellati <i>et al.</i> ,<br>2004 <sup>124</sup>    | 2                | 0                  | 0                           | 2                       | Adequate                   | NR                                     | Yes                              | 121                      | 0 (0)             |
| Raskin <i>et al.</i> ,<br>2000 <sup>113</sup>        | 2                | 0                  | 1                           | 3                       | Unclear                    | NR                                     | NR                               | 619                      | 31 (5)            |
| Ratner <i>et al.</i> ,<br>2000 <sup>125</sup>        | 1                | 0                  | 1                           | 2                       | Unclear                    | NR                                     | Yes                              | 534                      | 53 (9.93)         |
| Robertson <i>et al.</i> ,<br>2007 <sup>97</sup>      | 1                | 0                  | 1                           | 2                       | Adequate                   | No                                     | Yes                              | 347                      | 12 (3.46)         |
| Rosenstock <i>et al.</i> ,<br>2000 <sup>126</sup>    | 1                | 0                  | 1                           | 2                       | Unclear                    | NR                                     | Yes                              | 256                      | 2 (0.78)          |
| Rossetti <i>et al.</i> ,<br>2003 <sup>130</sup>      | 1                | 0                  | 0                           | 1                       | Unclear                    | NR                                     | NR                               | 51                       | NR                |
| Russell-Jones <i>et al.</i> ,<br>2004 <sup>133</sup> | 2                | 0                  | 1                           | 3                       | Unclear                    | NR                                     | Yes                              | 749                      | 49 (6.54)         |
| Schober <i>et al.</i> ,<br>2002 <sup>134</sup>       | 1                | 0                  | 0                           | 1                       | Unclear                    | NR                                     | Yes                              | 361                      | 12 (3.32)         |
| Standl <i>et al.</i> ,<br>2004 <sup>135</sup>        | 1                | 0                  | 1                           | 2                       | Unclear                    | NR                                     | Yes                              | 289                      | 37 (12.8)         |
| Vague <i>et al.</i> ,<br>2003 <sup>136</sup>         | 2                | 0                  | 1                           | 3                       | Unclear                    | NR                                     | Yes                              | 447                      | 22 (4.92)         |
| Witthaus <i>et al.</i> ,<br>2001 <sup>137</sup>      | 2                | 0                  | 0                           | 2                       | Unclear                    | NR                                     | Yes                              | 517                      | NR                |

NR=not reported

\*Citations of the studies are listed in the main article, available at [www.cmaj.ca/cgi/content/full/180/4/385](http://www.cmaj.ca/cgi/content/full/180/4/385).
