# Supplementary material
Source: PubMed Central journal article supplement (PMC2638025)
Supplement: supp_180_4_385_v2_9.pdf [file supp_180_4_385_v2_9.pdf]

**Appendix 9 (as supplied by the authors): Methodological quality of randomized controlled trials of long-acting insulin analogues in type 2 diabetes.**

| Study*                                                            | Jadad Score for: |                    |                             | Total<br>Jadad<br>Score | Allocation<br>Concealment? | Blinding<br>of<br>Outcome<br>Assessor? | Intent-to-<br>Treat<br>analysis? | Number<br>of<br>Patients | Dropouts<br>N (%) |
|-------------------------------------------------------------------|------------------|--------------------|-----------------------------|-------------------------|----------------------------|----------------------------------------|----------------------------------|--------------------------|-------------------|
|                                                                   | Randomization    | Double<br>Blinding | Withdrawals<br>and Dropouts |                         |                            |                                        |                                  |                          |                   |
| Eliashewitz <i>et al.</i> ,<br>2006 <sup>92</sup>                 | 1                | 0                  | 1                           | 2                       | Unclear                    | No                                     | Yes                              | 481                      | 19 (3.95)         |
| Fonseca <i>et al.</i> ,<br>2004 <sup>127</sup>                    | 1                | 0                  | 1                           | 2                       | Unclear                    | NR                                     | NR                               | 100                      | 7 (7)             |
| Fritsche <i>et al.</i> ,<br>2003 <sup>128</sup>                   | 2                | 0                  | 1                           | 3                       | Unclear                    | NR                                     | Yes                              | 695                      | 55 (7.91)         |
| Haak <i>et al.</i> , 2005 <sup>129</sup>                          | 1                | 0                  | 1                           | 2                       | Unclear                    | NR                                     | Yes                              | 505                      | 34 (6.73)         |
| Hermansen <i>et al.</i> ,<br>2006 <sup>91</sup>                   | 1                | 0                  | 1                           | 2                       | Adequate                   | No                                     | Yes                              | 475                      | 24 (5.05)         |
| Massi Benedetti <i>et al.</i> ,<br>2003 <sup>131</sup>            | 2                | 0                  | 1                           | 3                       | Unclear                    | NR                                     | Yes                              | 570                      | 46 (8.07)         |
| Pan <i>et al.</i> , 2007 <sup>108</sup>                           | 1                | 0                  | 1                           | 2                       | Unclear                    | No                                     | No                               | 444                      | 49 (11.06)        |
| Philis-Tsimikas <i>et al.</i> ,<br>2006 <sup>99</sup>             | 1                | 0                  | 1                           | 2                       | Adequate                   | No                                     | Yes                              | 498                      | 51 (10.24)        |
| Raslova <i>et al.</i> ,<br>2004 <sup>94</sup>                     | 1                | 0                  | 1                           | 2                       | Unclear                    | No                                     | Yes                              | 394                      | 16<br>(4.06%)     |
| Riddle <i>et al.</i> ,<br>2003 <sup>132</sup>                     | 2                | 0                  | 1                           | 3                       | Unclear                    | NR                                     | Yes                              | 756                      | 65 (8.6%)         |
| Rosenstock <i>et al.</i> ,<br>2001 <sup>111</sup>                 | 1                | 0                  | 1                           | 2                       | Unclear                    | NR                                     | Yes                              | 518                      | 49<br>(9.46%)     |
| Wang <i>et al.</i> , 2007 <sup>109</sup>                          | 1                | 0                  | 0                           | 1                       | Unclear                    | No                                     | Yes                              | 24                       | NR                |
| Yki-Järvinen <i>et al.</i> ,<br>2000 <sup>138</sup>               | 1                | 0                  | 0                           | 1                       | Unclear                    | NR                                     | Yes                              | 426                      | NR                |
| Yki-Järvinen <i>et al.</i> ,<br>2006 <sup>139</sup>               | 2                | 0                  | 1                           | 3                       | Unclear                    | NR                                     | Yes                              | 110                      | 3 (2.73)          |
| HOE 901/2004<br>Study Investigators<br>Group, 2003 <sup>140</sup> | 2                | 0                  | 1                           | 3                       | Unclear                    | NR                                     | Yes                              | 204                      | 2 (0.98)          |

NR=not reported.

\*Citations of the studies are listed in the main article, available at [www.cmaj.ca/cgi/content/full/180/4/385](http://www.cmaj.ca/cgi/content/full/180/4/385).
