# Supplementary material
Source: PubMed Central journal article supplement (PMC2638025)
Supplement: supp_180_4_385_v2_10.pdf [file supp_180_4_385_v2_10.pdf]

## Appendix 10 (as supplied by the authors): Differences between insulin analogues and conventional insulins in terms of glycemic control (weighted mean difference in hemoglobin A<sub>1c</sub>) in the management of type 1 diabetes mellitus in adults

### A: Comparison of insulin lispro versus regular human insulin

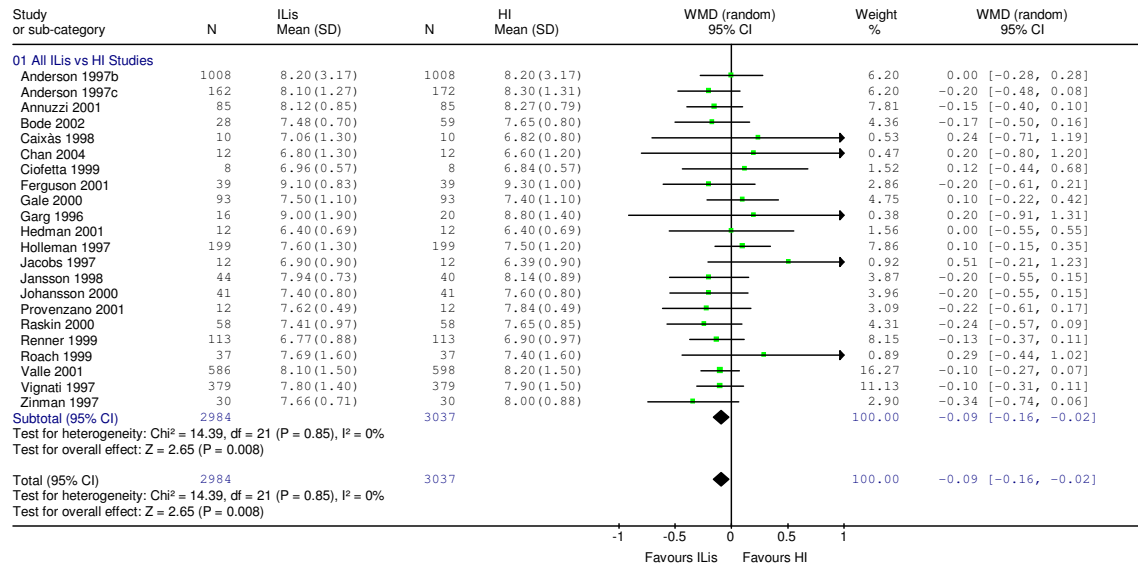

CI=confidence interval; ILis=insulin lispro; HI=regular human insulin; SD=standard deviation; WMD=weighted mean difference

### B: Comparison of insulin aspart versus regular human insulin

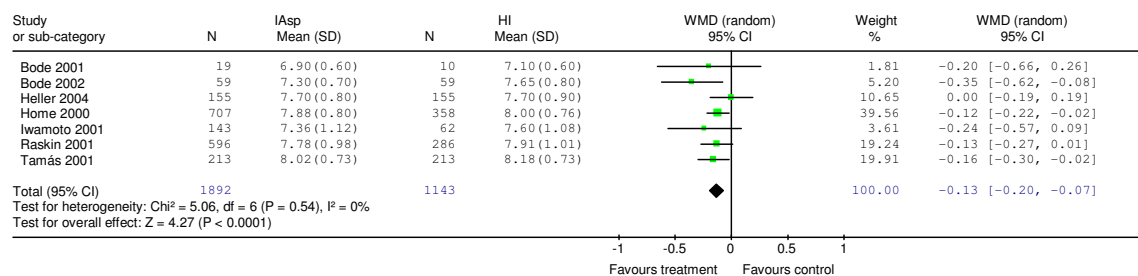

CI=confidence interval; IAsp=insulin aspart; HI=regular human insulin; SD=standard deviation; WMD=weighted mean difference

## C: Comparison of insulin glargine versus insulin NPH

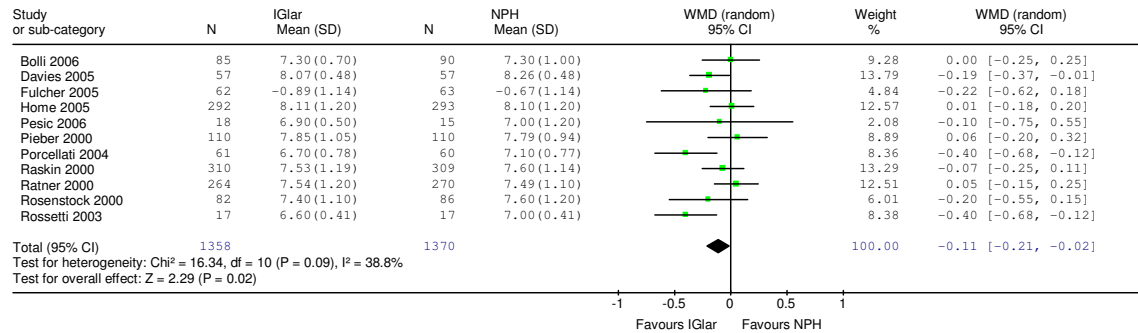

CI=confidence interval; IGlar=insulin glargine; NPH=insulin NPH (neutral protamine Hagedorn insulin); SD=standard deviation; WMD=weighted mean difference

## D: Comparison of insulin detemir versus insulin NPH

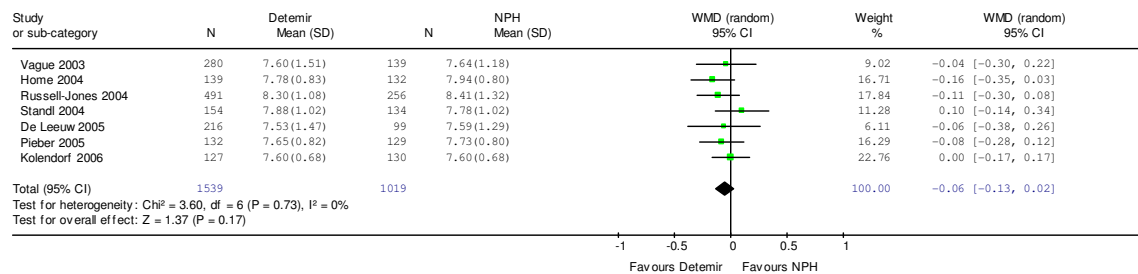

CI=confidence interval; IDet=insulin detemir; NPH=insulin NPH (neutral protamine Hagedorn insulin); SD=standard deviation; WMD=weighted mean difference
