# Supplementary material
Source: PubMed Central journal article supplement (PMC2638025)
Supplement: supp_180_4_385_v2_12.pdf [file supp_180_4_385_v2_12.pdf]

**Appendix 11 (as supplied by the authors): Differences between insulin analogues and conventional insulins in terms of glycemic control (weighted mean difference in hemoglobin A<sub>1c</sub>) in the management of type 2 diabetes mellitus in adults**

**A: Comparison of insulin lispro (or biphasic insulin lispro) versus regular human insulin (or biphasic human insulin)**

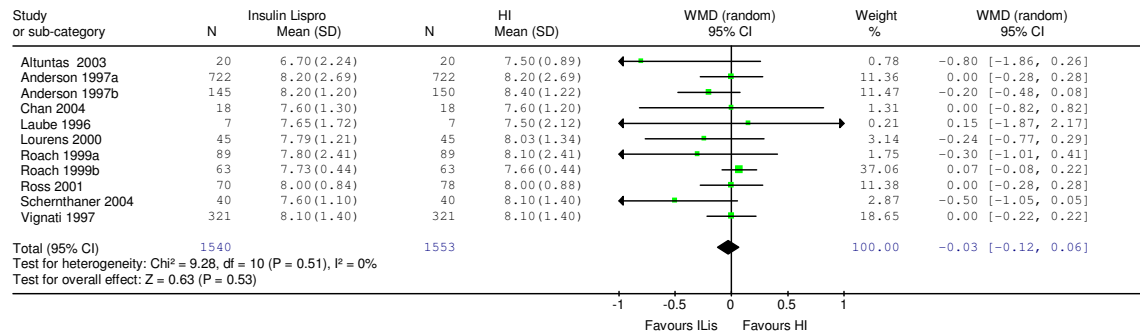

CI=confidence interval; ILis=insulin lispro; HI=regular human insulin; SD=standard deviation; WMD=weighted mean difference

**B: Comparison of insulin aspart (or biphasic insulin aspart) versus regular human insulin (or biphasic human insulin)**

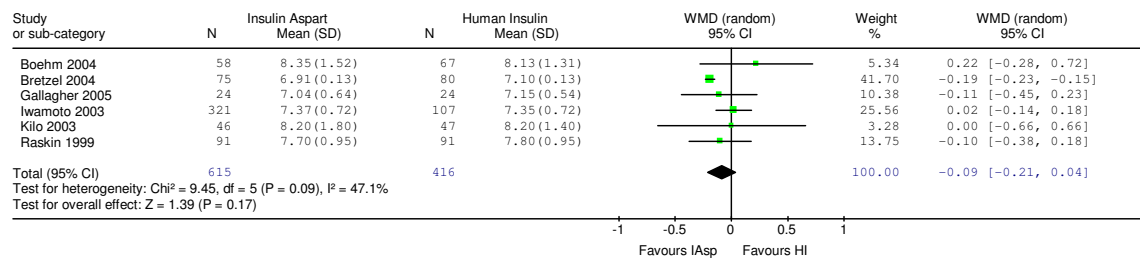

CI=confidence interval; IAsp=insulin aspart; HI=regular human insulin; SD=standard deviation; WMD=weighted mean difference

### C: Comparison of insulin glargine versus insulin NPH (both in combination with oral antidiabetic therapy)

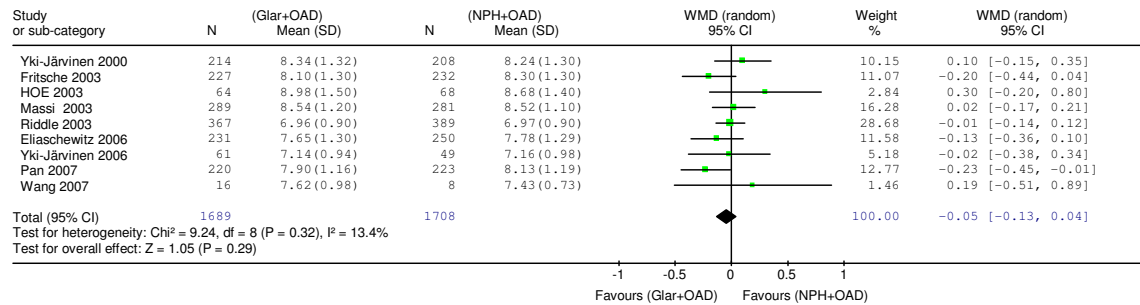

CI=confidence interval; IGlar=insulin glargine; NPH=insulin NPH (neutral protamine Hagedorn insulin); OAD= oral antidiabetic agents ; SD=standard deviation; WMD=weighted mean difference

### D: Comparison of insulin detemir versus insulin NPH (both in combination with oral antidiabetic therapy)

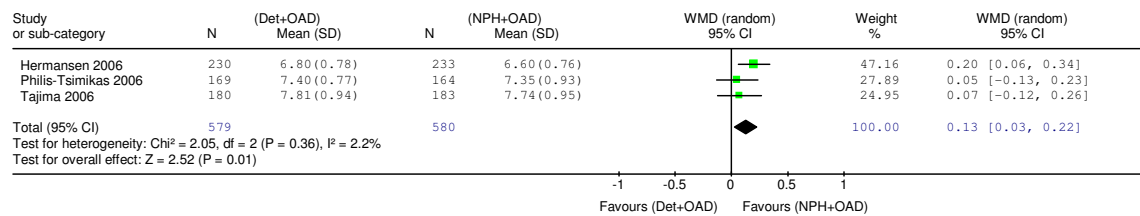

CI=confidence interval; IDet=insulin detemir; NPH=insulin NPH (neutral protamine Hagedorn insulin); OAD= oral antidiabetic agents ; SD=standard deviation; WMD=weighted mean difference
