# Supplementary material
Source: PubMed Central journal article supplement (PMC2638025)
Supplement: supp_180_4_385_v2_15.pdf [file supp_180_4_385_v2_15.pdf]

**Appendix 14: Adverse events (excluding hypoglycemia) reported in RCTs of rapid-acting insulin analogues in type 2 diabetes.**

| Study*                                      | Treatment arms                                     | Description of adverse events                                                                                                                                                                                                                                                                                                 |
|---------------------------------------------|----------------------------------------------------|-------------------------------------------------------------------------------------------------------------------------------------------------------------------------------------------------------------------------------------------------------------------------------------------------------------------------------|
| Altuntas <i>et al.</i> , 2003 <sup>49</sup> | ILis+NPH<br>ILis+Metf<br>HI+NPH                    | NR                                                                                                                                                                                                                                                                                                                            |
| Anderson, <sup>35</sup> 1997                | ILis+NPH or UL<br><br>HI+NPH or UL                 | Flu syndrome, headache, infection, pain, pharyngitis, rhinitis, and surgery were reported by >5% of patients.<br>There were no differences in AEs between the 2 groups                                                                                                                                                        |
| Anderson <i>et al.</i> , 1997 <sup>36</sup> | ILis+basal<br>HI+basal                             | There was no difference in the frequency or type of AE between the two treatment groups. The most common AE were flu syndrome, pharyngitis, rhinitis, other infections, or headache. No local reactions in the injection site were reported in the pts treated with insulin lispro.                                           |
| Boehm, <sup>50</sup> 2004                   | BIAsp30<br>BHI30/70                                | IAsp: 90% of patients (458 events) experienced at least one AE, 11 of these possibly treatment-related; 15 patients (26%) experienced 19 cardiovascular events<br>HI: 88% of patients (428 events) experienced at least one AE, 8 of these possibly treatment-related; 17 patients (25%) experienced 19 cardiovascular events |
| Bretzel, <sup>34</sup> 2004                 | IAsp+NPH (bedtime)<br>HI+NPH (bedtime)<br>BHI30/70 | Bronchitis and upper respiratory tract infections in >20% of patients on IAsp; >20% of patients on HI; 10% of patients on HI (70/30)                                                                                                                                                                                          |
| Chan <i>et al.</i> , 2004 <sup>33</sup>     | ILis+NPH<br>HI+NPH                                 | Mild weight gain of 1.1 kg were observed at the end of the study, but there was no difference between the two arms (P=0.342)                                                                                                                                                                                                  |
| Gallagher and Home, 2005 <sup>51</sup>      | IAsp+NPH<br>HI+NPH                                 | NR                                                                                                                                                                                                                                                                                                                            |
| Gallagher, <sup>23</sup> 2007 (new)         | IAsp<br>HI                                         | NR                                                                                                                                                                                                                                                                                                                            |
| Herz <i>et al.</i> , 2002 <sup>37</sup>     | ILis Mix 25<br>Gly                                 | NR                                                                                                                                                                                                                                                                                                                            |
| Herz <i>et al.</i> , 2003 <sup>38</sup>     | ILis Mix 25<br>HI (30/70)                          | NR                                                                                                                                                                                                                                                                                                                            |
| Iwamoto, 2003 <sup>52</sup>                 | BIAsp30<br>BHI30/70                                | NR                                                                                                                                                                                                                                                                                                                            |
| Kilo, <sup>53</sup> 2003                    | BIAsp30+ Metf<br>NPH+Metf<br>BHI30/70+ Metf        | Upper respiratory tract infection was most common AE. One patient experienced blurred vision and pain in the extremities. BIAsp and BHI groups gained slightly more weight than NPH group.<br>Total of 203 AEs reported for 87 (62%) patients. Upper respiratory tract infection in 21 patients.                              |
| Kokić <i>et al.</i> , 2003 <sup>54</sup>    | Glim+Metf<br>BHI30/70+ NPH<br>ILis+Metf            | NR                                                                                                                                                                                                                                                                                                                            |
| Kotsanos <i>et al.</i> , 1997 <sup>39</sup> | ILis<br>HI                                         | NR                                                                                                                                                                                                                                                                                                                            |
| Laube <i>et al.</i> , 1996 <sup>55</sup>    | ILis<br>HI                                         | NR                                                                                                                                                                                                                                                                                                                            |
| Lourens, <sup>56</sup> 2000                 | ILis Mix25<br>BHI30/70                             | Not reported except for slight weight gain in both arms.                                                                                                                                                                                                                                                                      |

|                                               |                        |                                                                                                                                                                                                                                                                                                                |
|-----------------------------------------------|------------------------|----------------------------------------------------------------------------------------------------------------------------------------------------------------------------------------------------------------------------------------------------------------------------------------------------------------|
| Niskanen, <sup>20</sup> 2004                  | BIAsp30<br>ILis Mix25  | Incidence of AEs was similar in both groups<br><br>URT infections & influenza-like symptoms were the most frequently reported ADRs (reported by > 5% of patients).<br><br>Non of the serious ADE were judged to be related to trial products                                                                   |
| Raskin, <sup>61</sup> 1999<br>[Abstract]      | IAsp+NPH<br>HI+NPH     | Authors state majority of AEs were mild and considered unrelated to treatment;<br>IAsp had slightly higher frequency of non-serious AEs                                                                                                                                                                        |
| Roach, <sup>47</sup> 1999                     | ILis Mix25<br>BHI30/70 | No clinically significant differences between treatments with respect to incidence of AE.                                                                                                                                                                                                                      |
| Roach <i>et al.</i> ,<br>1999 <sup>48</sup>   | ILis Mix50<br>BHI50    | No significant difference between treatments with respect to the incidence of adverse events.                                                                                                                                                                                                                  |
| Ross, <sup>41</sup> 2001                      | ILis+NPH<br>HI+NPH     | One patient required bilateral amputations above the knee. Body weight increased similarly in both groups.                                                                                                                                                                                                     |
| Schernthaner, <sup>32</sup><br>2004           | ILis Mix50<br>BHI30/70 | AEs reported by both groups were infection (7.5%), back pain (5.0%) and weight gain (5.0%). 2 serious AEs during run-in (not considered related to treatment).<br>ILis: 11 patients (27.5%) had one or more AE<br>HI: 14 patients (35.0%) had one or more AE; 4 serious (not considered related to treatment). |
| Vignati <i>et al.</i> ,<br>1997 <sup>44</sup> | ILis+NPH<br>HI+NPH     | No significant differences in the number of treatment- or diseased-related adverse events for the two treatment groups.                                                                                                                                                                                        |

ADR=adverse drug reaction; AE=adverse events; BIAsp=biphasic insulin aspart; BHI=biphasic human insulin; DM=diabetes mellitus; Glim=glimipiride; Gly=glyburide; HI=conventional human insulin; IAsp=insulin aspart; IDet=insulin detemir; IGlar=insulin glargine; Metf=metformin; Mix=premixed (biphasic) insulin; NPH=neutral protamine Hagedorn; NR=not reported; OAD=oral antidiabetic agent; RCTs=randomized controlled trials; SAEs=serious adverse events.

\*Citations of the studies are listed in the main article, available at [www.cmaj.ca/cgi/content/full/180/4/385](http://www.cmaj.ca/cgi/content/full/180/4/385).
